# Supplementary material
Source: publisher figshare collection journal article supplement (https://wiley.figshare.com/articles/dataset/_/3530048)
Supplement: Supplementary file 1 [file 1]

***Ecological Archives* E089-165-A1**

**Cang Hui and Melodie A. McGeoch. 2008. Does the self-similar species distribution model lead to unrealistic predictions? *Ecology* 89:2946–2952.**

## Appendix A: Notation from Maddux (2004) used in the context

Consistent with the description in Maddux (2004), the letter  $x$  in a cell means that the species does not occur in that cell, the letter  $o$  means that the species is present in the cell, while the letter  $n$  signifies that the species may or may not be present in the cell. If each of  $p$ ,  $q$ ,  $r$ , and  $s$  denote one of  $x$ ,  $o$ , or  $n$ , then  $H(p, q)$  is the fraction of species with a  $(p, q)$  state of the two halves (bisected rectangle in figure 1A), where  $p$  indicates the state of the left half and  $q$  the right half. For example,  $H(o, o)$  is the fraction of species present in both halves.

$L(p, q, r)$  is the fraction of species with a  $(p, q, r)$  state of the three parts (bisected rectangle in figure 1B), where  $p$  indicates the state of left-top quarter,  $q$  the left-bottom quarter, and  $r$  the right half. For example,  $L(o, x, o)$  is the fraction of species shared by the left-top quarter and right half, but absent from the left-bottom quarter.  $F(p, q, r, s)$  is the fraction of species with a  $(p, q, r, s)$  state of the four parts (bisected rectangle in figure 1C), where  $p$  indicates the state of left-top-left eighth,  $q$  the left-top-right eighth,  $r$  the left-bottom quarter, and  $s$  the right half. For example,  $F(o, x, o, x)$  is the species shared by the left-top-left eighth and left-bottom quarter, but absent from the left-top-right eighth and the right half.

## LITERATURE CITED

Maddux, R. D. 2004. Self-similarity and the species-area relationship. *American Naturalist* 163:616-626.
