# Supplementary material
Source: publisher figshare collection journal article supplement (https://wiley.figshare.com/articles/dataset/_/3530048)
Supplement: Supplementary file 2 [file 1 › appendix-A.htm]

Ecological Archives E089-165-A1


### *Ecological Archives* E089-165-A1

### **Cang Hui and Melodie A. McGeoch. 2008. Does the self-similar species distribution model lead to unrealistic predictions? *Ecology* 89:2946–2952.**

Appendix A. Notation from Maddux (2004) used in the context. Click here for a PDF file of the appendix.

---


[Back to E089-165]
